# Supplementary material for: PTCH1-null induced pluripotent stem cells exclusively differentiate into immature ectodermal cells with large areas of medulloblastoma-like tissue
Source: PubMed Central journal article supplement (PMC9135936; doi:10.1007/s12672-022-00498-x), 2022-05-27
Supplement: 12672_2022_498_MOESM4_ESM.pdf [file 12672_2022_498_MOESM4_ESM.pdf]

## *PTCH1*<sup>-/-</sup> teratoma

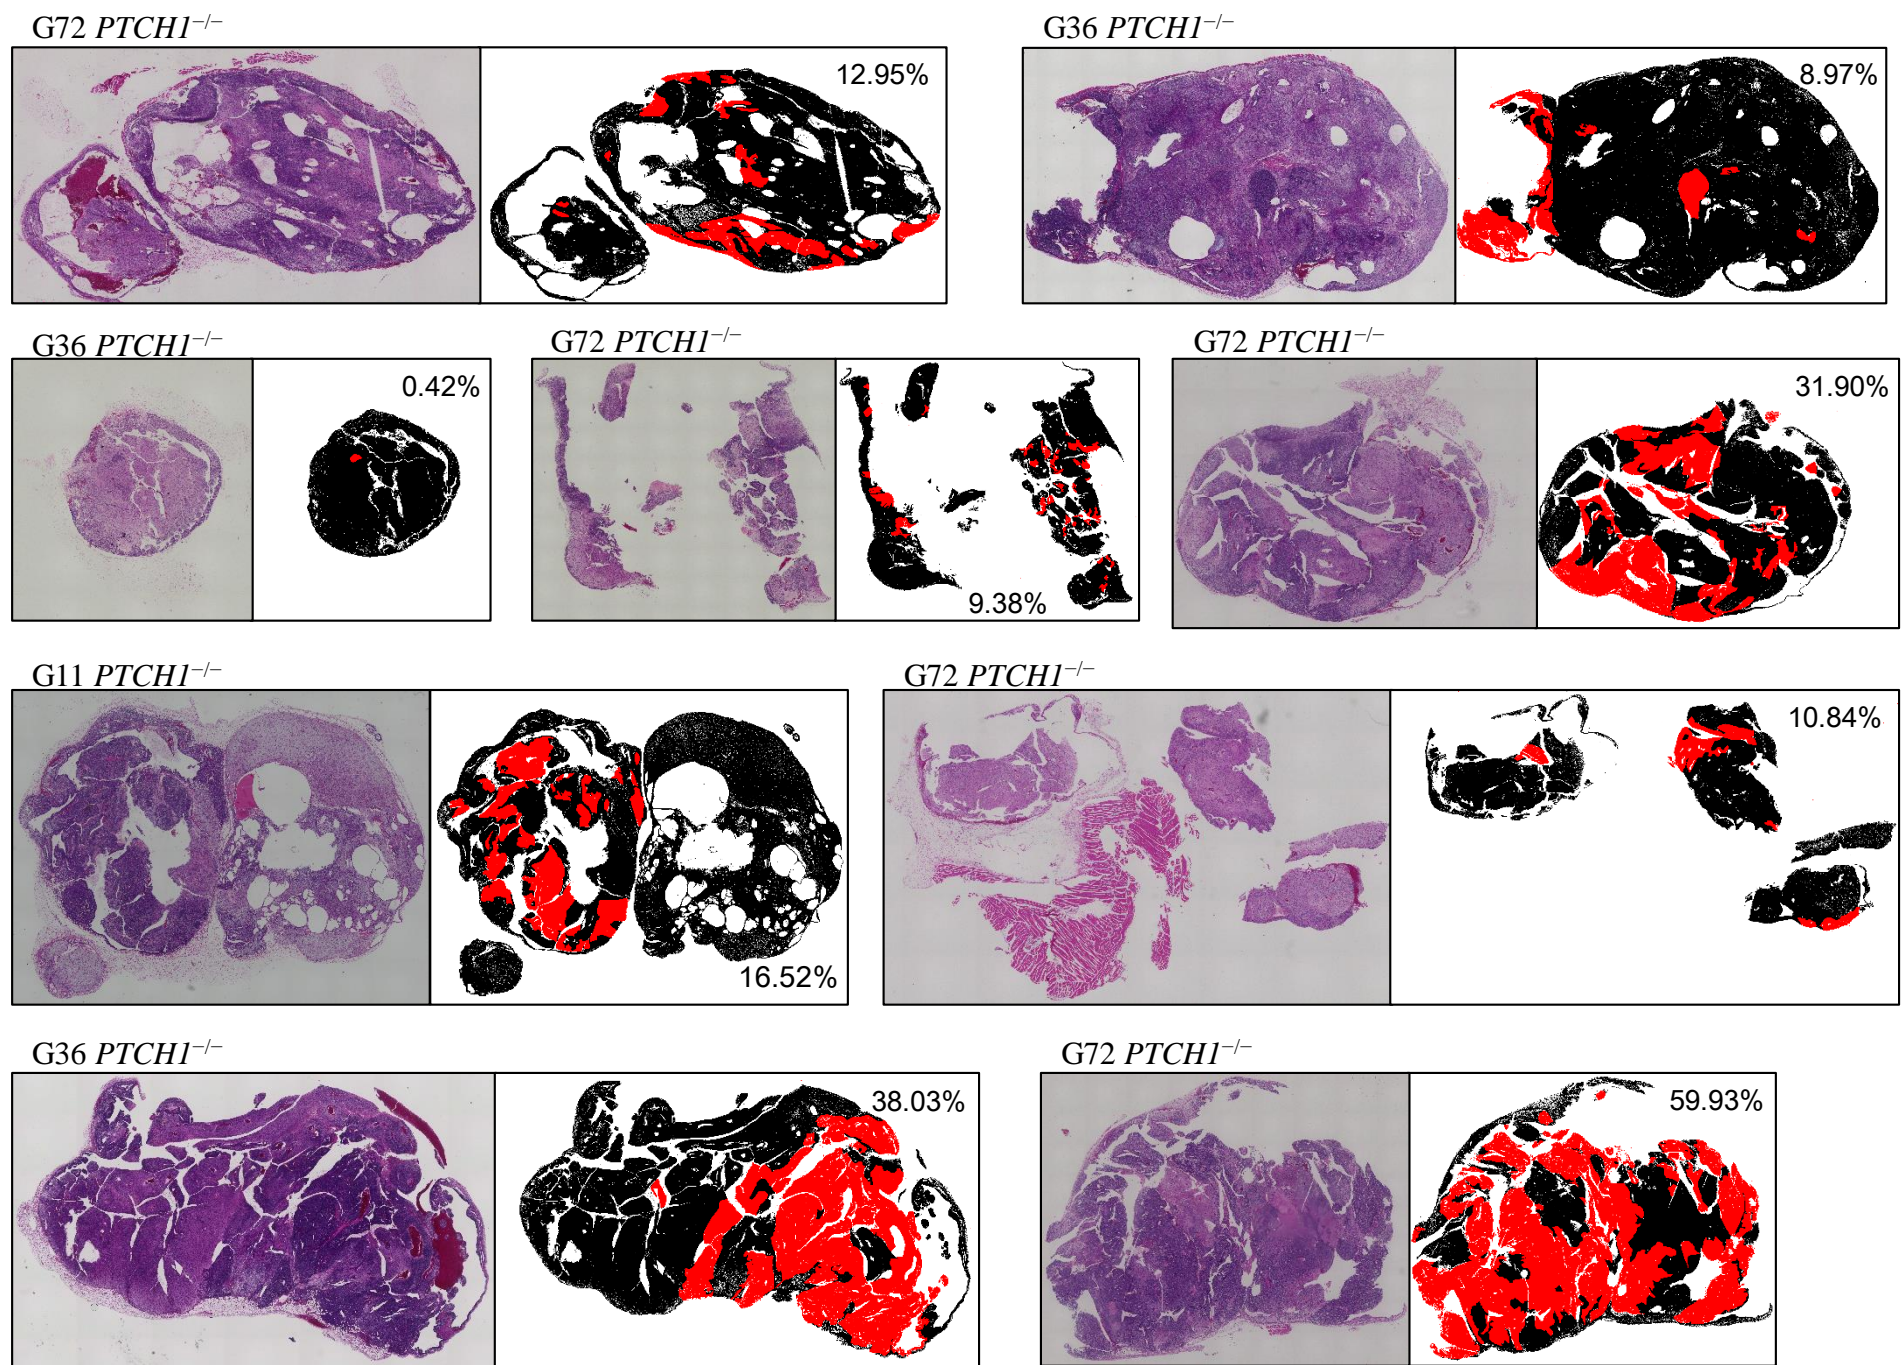

## *PTCH1*<sup>+/-</sup> teratoma

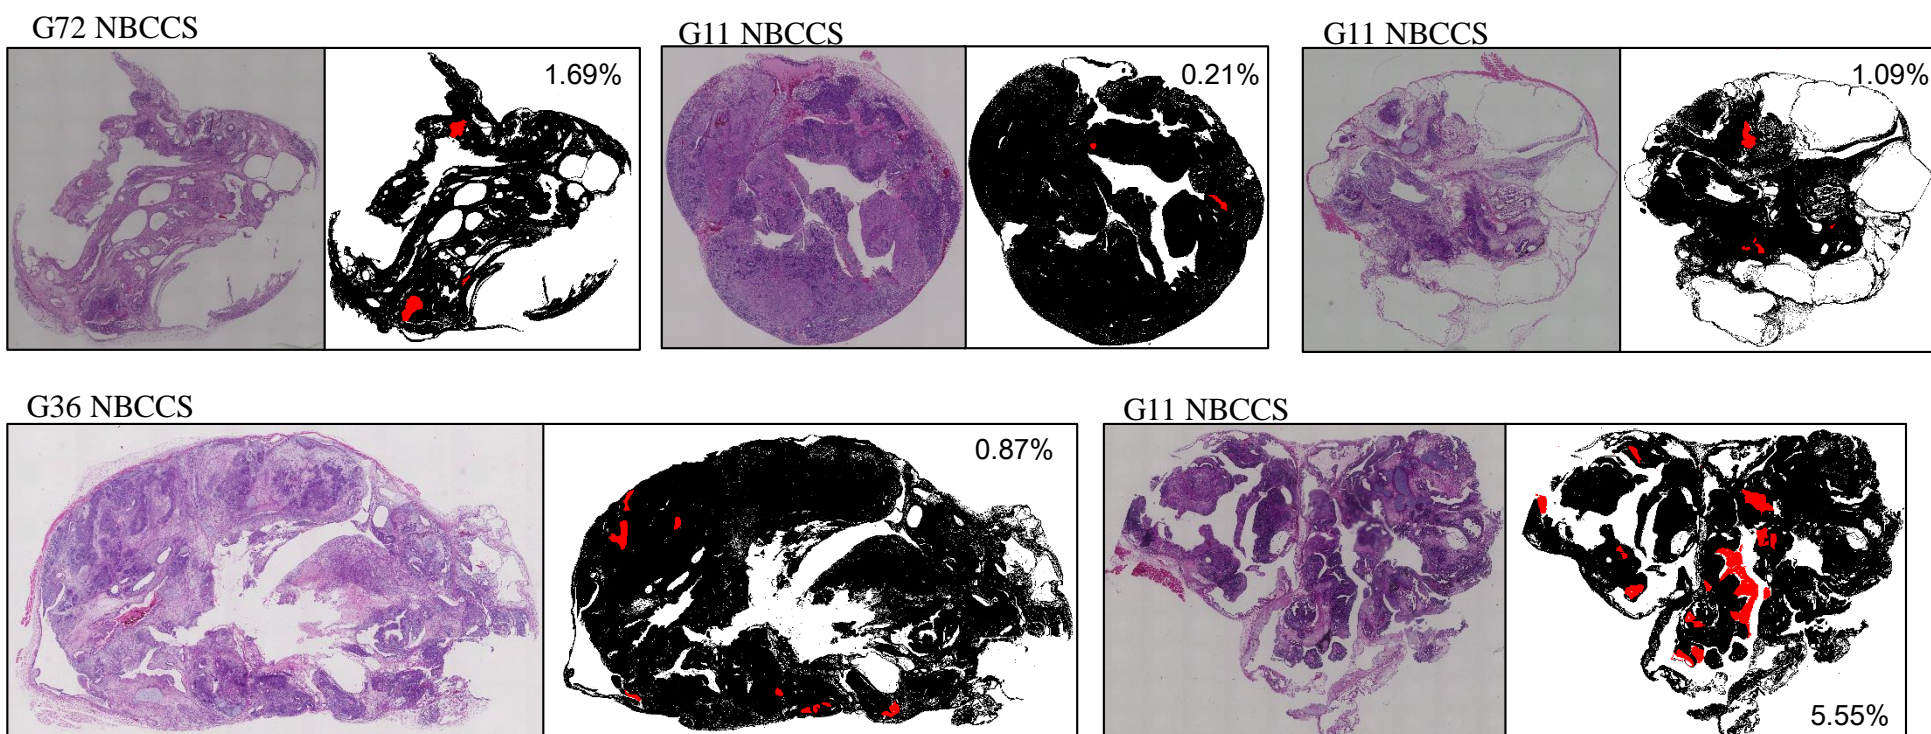

**Figure S2. Whole slice images of *PTCH1*<sup>-/-</sup> and *PTCH1*<sup>+/-</sup> teratomas.**

The left half of each panel represents an image of a HE-stained teratoma slice. In the right half, the area of the teratoma is filled with black from which the apparent tissue from a mouse origin was excluded. Medulloblastoma-like tissue expressing  $\beta$ III tubulin, synaptophysin, and Ki67 is filled in red. The numbers of pixels in the black and red areas were counted by PixelCounter (<https://vector.co.jp/soft/win95/art/se385899.html>). The percentage of areas occupied by medulloblastomas is indicated in the right half.
