# Supplementary material for: PTCH1-null induced pluripotent stem cells exclusively differentiate into immature ectodermal cells with large areas of medulloblastoma-like tissue
Source: PubMed Central journal article supplement (PMC9135936; doi:10.1007/s12672-022-00498-x), 2022-05-27
Supplement: 12672_2022_498_MOESM5_ESM.pdf [file 12672_2022_498_MOESM5_ESM.pdf]

A

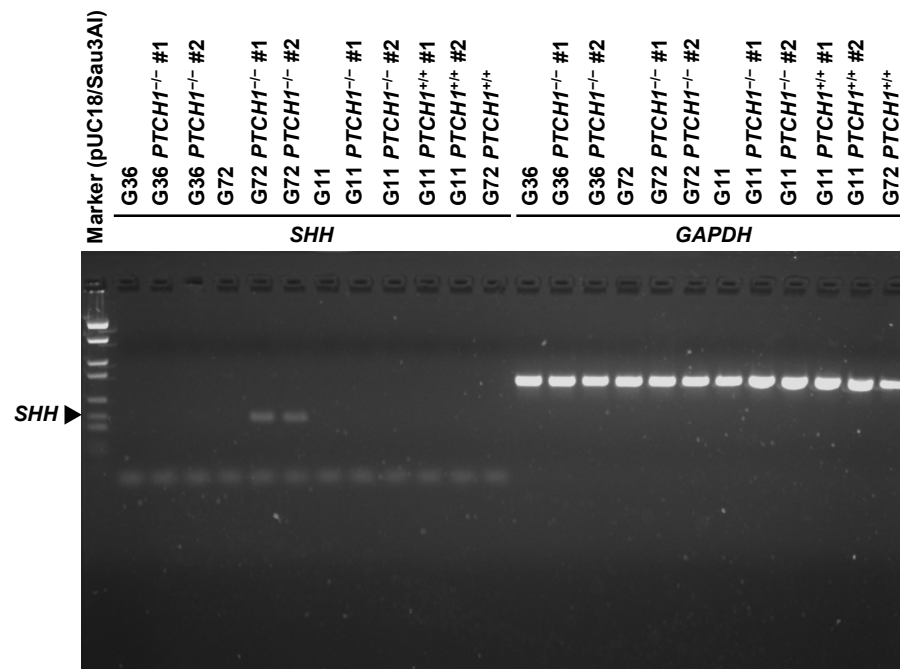

B

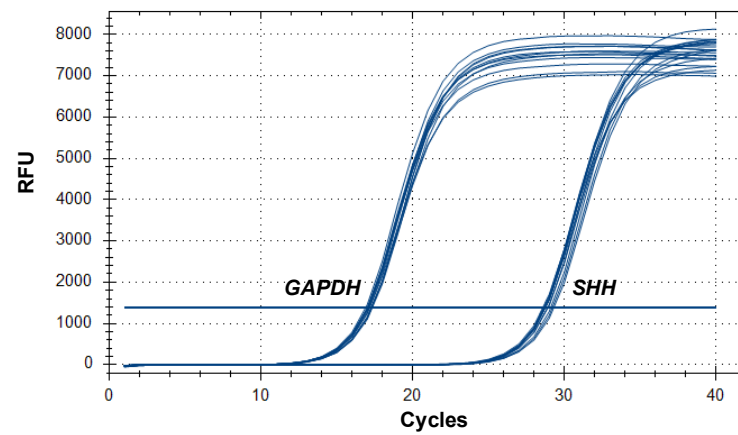

**Figure S3. The expression of *SHH* in iPSCs.** (A) The expression of *SHH* in iPSC lines. (B) The amplification plot of *SHH* and *GAPDH* in two *G72-PTCH1*<sup>-/-</sup> lines. The blue horizontal line indicates the threshold line to determine *Ct* value.
